# Supplementary material
Source: HighWire-hosted journal article supplement (https://bjsm.bmj.com/content/56/4/213)
Supplement: inline-supplementary-material-1 [file inline-supplementary-material-1.pdf]

**Supplementary file 1.** PubMed, EBSCOhost and Web of Science (core collection) search string.

**PubMed:**

Search: ("Exercise-induced asthma" OR "Exercise induced asthma" OR "Exercise-induced bronchoconstriction" OR "Exercise induced bronchoconstriction" OR "Exercise-induced bronchospasm" OR "Exercise induced bronchospasm" OR EIB OR EIA OR Asthma\* OR bronchoconstriction\*) AND (athlete\* OR sport\* OR exercis\* OR "athletic population" OR "active population" OR "physical activity") AND (epidemiology OR rate OR prevalence OR incidence OR percentage OR "odds ratio" OR "relative risk" OR "risk factor" OR risk OR odds) NOT (COPD OR "chronic obstructive pulmonary disease" OR cancer OR animal\* OR HIV OR "human immunodeficiency virus" OR AIDS OR "acquired immunodeficiency syndrome" OR postoperative OR preoperative OR pre-surgery OR post-surgery OR infant OR "position statement" OR "systematic review" OR "meta-analysis" OR infancy OR paediatric OR pregnancy OR nuclear OR child) Filters: Journal Article, Humans, English, MEDLINE, from 1990 - 2020.

**EBSCOhost:**

Search: "human AND ("Exercise-induced asthma" OR "Exercise induced asthma" OR "Exercise-induced bronchoconstriction" OR "Exercise induced bronchoconstriction" OR "Exercise-induced bronchospasm" OR "Exercise induced bronchospasm" OR EIB OR EIA OR Asthma\* OR bronchoconstriction\*) AND (athlete\* OR sport\* OR exercis\* OR "athletic population" OR "active population" OR "physical activity") AND (epidemiology OR rate OR prevalence OR incidence OR percentage OR "odds ratio" OR "relative risk" OR "risk factor" OR risk OR odds) NOT (COPD OR "chronic obstructive pulmonary disease" OR cancer OR animal\* OR HIV OR "human immunodeficiency virus" OR AIDS OR "acquired immunodeficiency syndrome" OR postoperative OR preoperative OR pre-surgery OR post-surgery OR infant OR "position statement" OR "systematic

review" OR "meta-analysis" OR infancy OR paediatric OR pregnancy OR nuclear OR child) Scholarly (Peer Reviewed) Journals; Published Date: 19960101-20200731.

**Web of Science:**

human AND ("Exercise-induced asthma" OR "Exercise induced asthma" OR "Exercise-induced bronchoconstriction" OR "Exercise induced bronchoconstriction" OR "Exercise-induced bronchospasm" OR "Exercise induced bronchospasm" OR EIB OR EIA OR Asthma\* OR bronchoconstriction\*) AND (athlete\* OR sport\* OR exercis\* OR "athletic population" OR "active population" OR "physical activity") AND (epidemiology OR rate OR prevalence OR incidence OR percentage OR "odds ratio" OR "relative risk" OR "risk factor" OR risk OR odds) NOT (COPD OR "chronic obstructive pulmonary disease" OR cancer OR animal\* OR HIV OR "human immunodeficiency virus" OR AIDS OR "acquired immunodeficiency syndrome" OR postoperative OR preoperative OR pre-surgery OR post-surgery OR infant OR "position statement" OR "systematic review" OR "meta-analysis" OR infancy OR paediatric OR pregnancy OR nuclear OR child) (All Fields) and 2020 or 2019 or 2018 or 2017 or 2016 or 2015 or 2014 or 2013 or 2012 or 2011 or 2010 or 2009 or 2008 or 2007 or 2006 or 2005 or 2004 or 2003 or 2002 or 2001 or 2000 or 1999 or 1998 or 1997 or 1996 or 1995 or 1994 or 1993 or 1992 or 1991 (Publication Years) and Articles (Document Types) and English (Languages).
